# Supplementary material
Source: PubMed Central journal article supplement (PMC5695827)

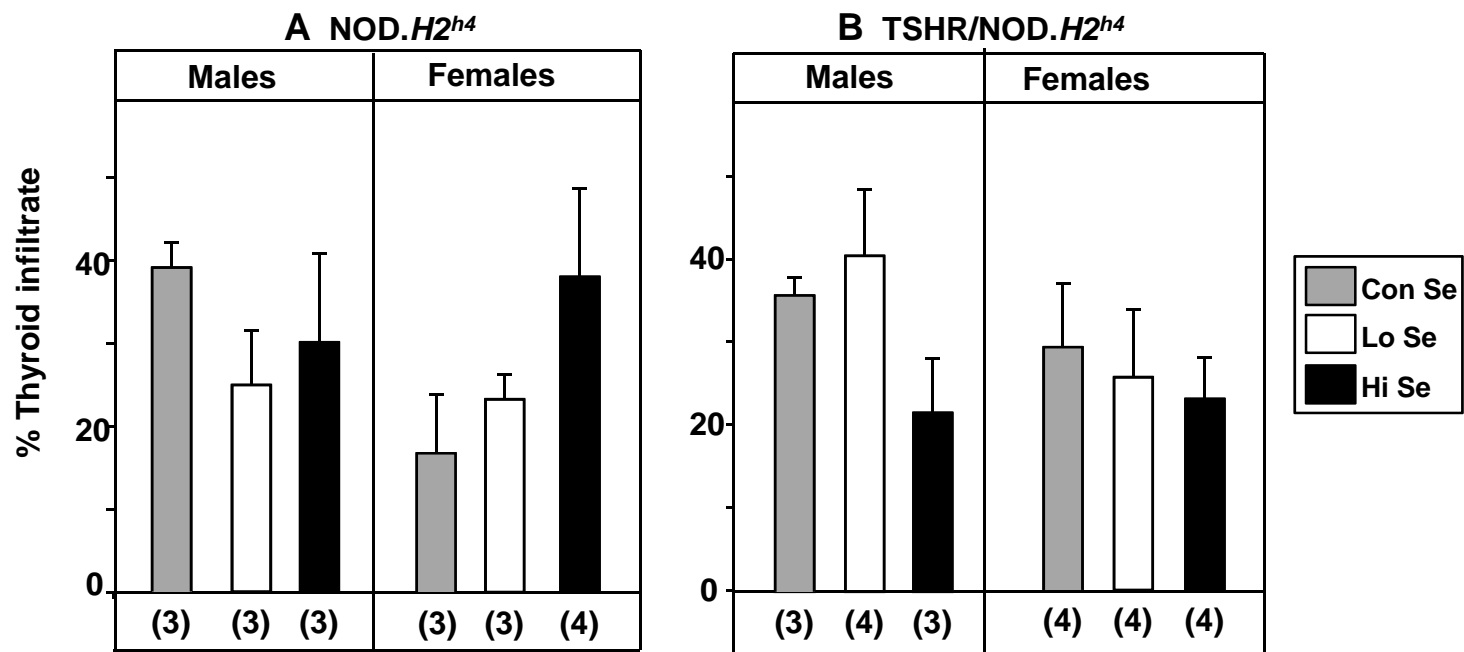

Supplementary Figure S1

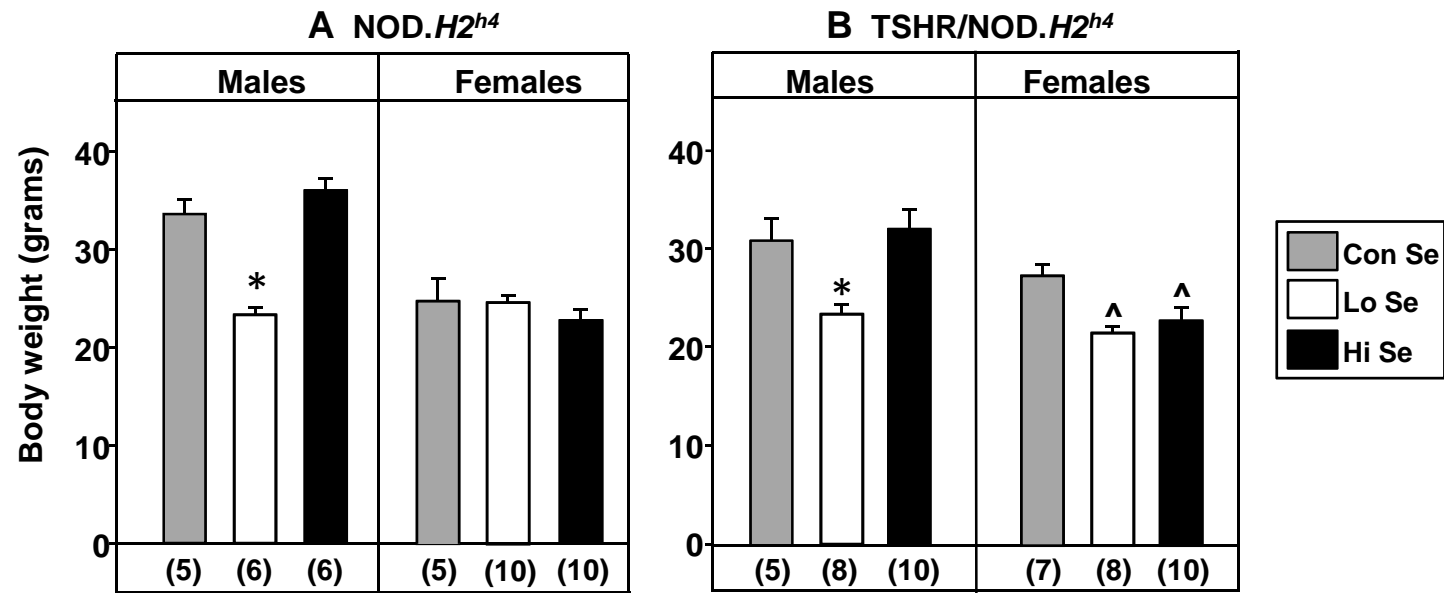

Supplementary Figure S2

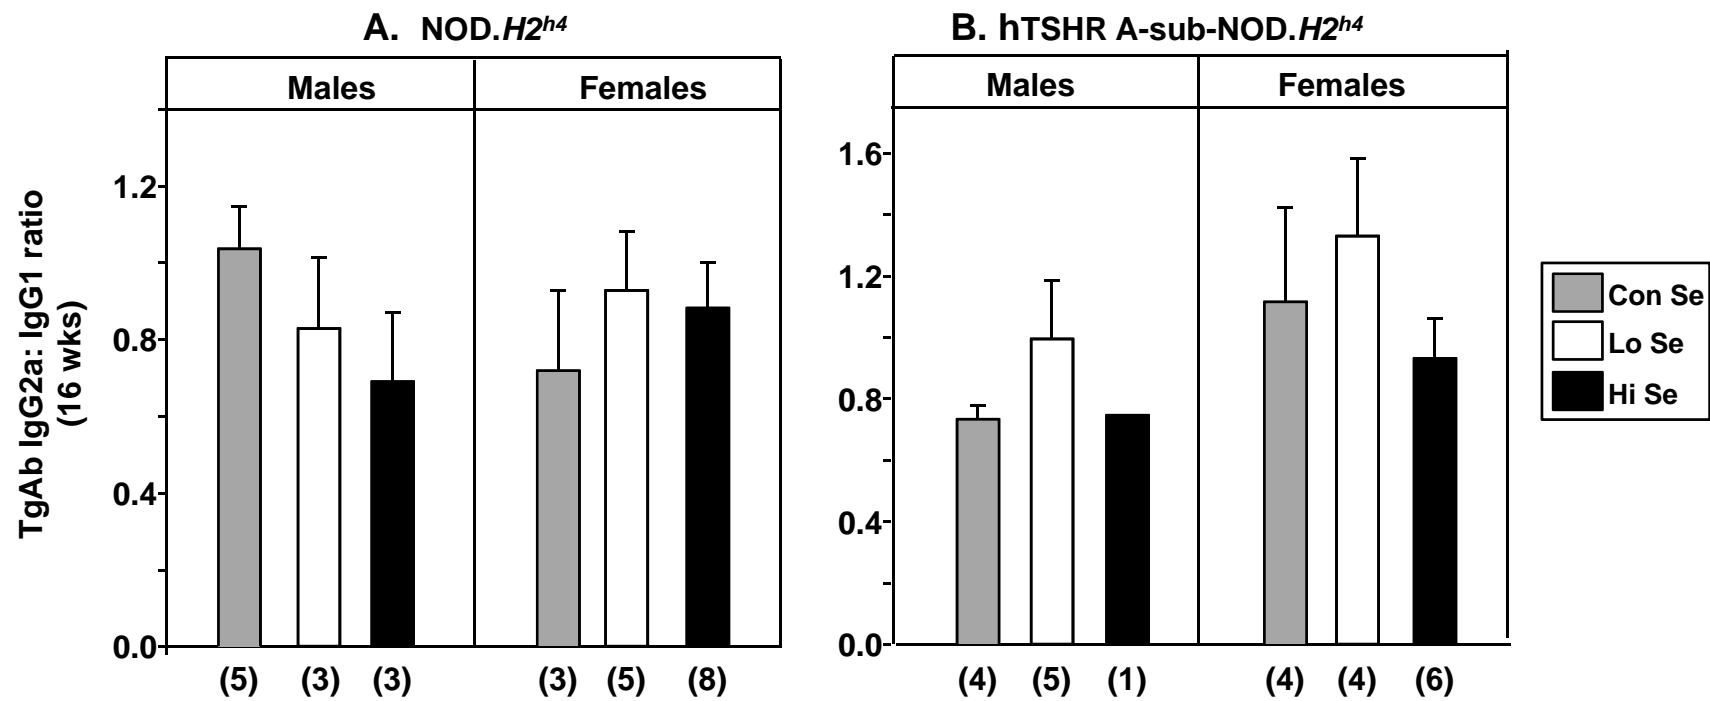

Supplementary Fig. S3

Supplement: en.2017-00275.sf1.pdf [file en.2017-00275.sf1.pdf]
